# Supplementary material
Source: PubMed Central journal article supplement (PMC1559971)
Supplement: rspb20053218s02.pdf [file rspb20053218s02.pdf]

# ELECTRONIC APPENDIX

This is the Electronic Appendix to the article

## **Importance of climatological downscaling and plant phenology for red deer in heterogeneous landscapes**

by

Nathalie Pettorelli, Atle Mysterud, Nigel G. Yoccoz, Rolf Langvatn  
and Nils Chr. Stenseth

*Proc. R. Soc. B* ([doi:10.1098/rspb.2005.3218](https://doi.org/10.1098/rspb.2005.3218))

Electronic appendices are refereed with the text; however, no attempt is made to impose a uniform editorial style on the electronic appendices.

## Online supporting information

For: Nathalie Pettorelli, Atle Mysterud, Nigel G. Yoccoz, Rolf Langvatn and Nils Chr. Stenseth: "Importance of climatological downscaling and plant phenology for red deer in heterogeneous landscapes"

Table 1: Parameter estimates for temperature and precipitations in April. 50 stations in Norway (West Coast) were considered over 38 years (1964-2002). For each station, altitude and latitude were known. St is here an abbreviation for Standardized (for each standardized variable, the mean=0 and the standard deviation=1).

| <i>Parameters</i>                        | <i>Estimates</i> | <i>SE</i> |
|------------------------------------------|------------------|-----------|
| <i>Model A: Temperature</i>              |                  |           |
| Intercept                                | 4.16             | 0.18      |
| NAO in April                             | 0.30             | 0.10      |
| St (Latitude)                            | -0.52            | 0.02      |
| St (Altitude)                            | -1.13            | 0.02      |
| NAO in April*St (Latitude)               | 0.07             | 0.01      |
| NAO in April*St (Altitude)               | -0.003           | 0.01      |
| NAO in April*St (Latitude)*St (Altitude) | 0.0007           | 0.01      |
| <i>Model B: Precipitation</i>            |                  |           |
| Intercept                                | 77.65            | 6.54      |
| NAO in April                             | -1.25            | 3.67      |
| St (Latitude)                            | -4.89            | 1.59      |
| St (Altitude)                            | -5.08            | 5.48      |
| NAO in April*St (Latitude)               | -4.78            | 1.59      |
| NAO in April*St (Altitude)               | 2.26             | 3.41      |
| NAO in April*St (Latitude)*St (Altitude) | -0.31            | 2.91      |

Table 2: Parameter estimates and test statistics for the analysis of snow depth, based on the linear mixed models (with year as random effect). These estimates are the ones used for drawing figure 3 in the main text. The main term of interest related to the mechanisms discussed is bolded. St is here an abbreviation for Standardized (for each standardized variable, the mean=0 and the standard deviation=1).

| Parameter                                              | L.S.<br>mean  | SE            | DF          | T            | P                |
|--------------------------------------------------------|---------------|---------------|-------------|--------------|------------------|
| Intercept                                              | 3.2527        | 0.1235        | 2914        | 26.338       | <0.001           |
| st(Latitude)                                           | 0.3330        | 0.0210        | 2914        | 15.828       | <0.001           |
| st(Altitude)                                           | 0.7237        | 0.0168        | 2914        | 43.030       | <0.001           |
| NAO-winter                                             | -0.0851       | 0.0554        | 25          | -1.536       | 0.137            |
| st(Distance from the coast)                            | 0.0043        | 0.0232        | 2914        | 0.188        | 0.851            |
| st(Altitude)*st(Distance from the coast)               |               |               |             | -            |                  |
|                                                        | -0.2496       | 0.0156        | 2914        | 16.015       | <0.001           |
| NAO in Winter*st(Distance from the coast)              | -0.0030       | 0.0067        | 2914        | -0.451       | 0.652            |
| <b>NAO in Winter*st(Altitude)</b>                      | <b>0.0470</b> | <b>0.0074</b> | <b>2914</b> | <b>6.321</b> | <b>&lt;0.001</b> |
| NAO in Winter*st(Altitude)*st(Distance from the coast) | -0.0061       | 0.0069        | 2914        | -0.885       | 0.376            |

Table 3: Parameter estimates (median and confidence interval limits (CI) at 95%) of (A) NDVI for the 1st of May, body mass of adult (B) female and (C) male red deer, based on the spatial bootstrapping (500 simulations) of the linear mixed models (with year as random effect). These estimates are the ones used for drawing figure 3 in the main text. The main terms of interest related to the mechanisms discussed are bolded. St is here an abbreviation for Standardized (for each standardized variable, the mean=0 and the standard deviation=1).

| Parameters                                          | CI low         | Mean           | CI high        |
|-----------------------------------------------------|----------------|----------------|----------------|
| <b>A. NDVI-1<sup>st</sup> of May</b>                |                |                |                |
| Intercept                                           | 0.15275        | 0.16497        | 0.17844        |
| st(Latitude)                                        | -0.01513       | -0.00468       | 0.00414        |
| st(Distance from the coast)                         | -0.06031       | -0.04931       | -0.03671       |
| NAO-winter                                          | -0.00411       | 0.00093        | 0.00622        |
| NAO-April                                           | 0.01334        | 0.01856        | 0.02327        |
| st(Altitude)                                        | 11.08563       | 12.51523       | 13.99098       |
| st(Altitude) <sup>2</sup>                           | 1.49808        | 2.18869        | 2.78291        |
| st(Diversity of aspects)                            | 0.00182        | 0.00495        | 0.00796        |
| st(Prop. of north facing slopes)                    | 0.00408        | 0.00760        | 0.01087        |
| <b>NAO-winter*st(Altitude)</b>                      | <b>0.00120</b> | <b>0.00530</b> | <b>0.00926</b> |
| NAO-April*st(Latitude)                              | 0.00037        | 0.00549        | 0.01104        |
| NAO-April*st(Distance from the coast)               | 0.00012        | 0.00578        | 0.01096        |
| NAO-April*st(Altitude)                              | 0.00150        | 0.00566        | 0.00982        |
| st(Latitude)*st(Distance from the coast)            | 0.01450        | 0.02221        | 0.02919        |
| NAO-winter*st(Distance from the coast)              | -0.00076       | 0.00462        | 0.00996        |
| NAO-winter*st(Distance from the coast)*st(Altitude) | -0.00735       | -0.00499       | -0.00262       |
| <b>B. Body mass adult female red deer</b>           |                |                |                |
| Intercept                                           | 0.03862        | 1.77197        | 2.83186        |
| Age = 2 yrs. old                                    | 0.16334        | 0.17353        | 0.18599        |
| Age = 3 yrs. old                                    | 0.23755        | 0.24669        | 0.25634        |
| Age = 4 yrs. old                                    | 0.28274        | 0.29304        | 0.30419        |
| Age = 5-19 yrs. old                                 | 0.32024        | 0.32945        | 0.33784        |
| Date of culling                                     | -0.00020       | -0.00008       | 0.00004        |
| Current density                                     | -0.03723       | -0.01573       | 0.00393        |
| NAO-winter                                          | 0.00331        | 0.00570        | 0.00803        |
| Cohort density                                      | -0.06673       | -0.05051       | -0.03526       |
| Diversity of altitudes                              | 0.01713        | 0.04794        | 0.07755        |
| Diversity of aspects                                | 0.42133        | 0.93797        | 1.78428        |
| Prop. of north facing slopes                        | -0.72811       | -0.49306       | -0.20226       |
| Prop. of high altitude habitat                      | -0.09753       | -0.03349       | 0.03112        |
| Latitude                                            | -0.00227       | 0.00610        | 0.01688        |
| Distance from the coast                             | 0.04301        | 0.06103        | 0.07725        |
| Population P2                                       | -0.04244       | 0.01354        | 0.06206        |
| Population P3                                       | -0.01463       | 0.06774        | 0.13887        |
| <b>NDVI yearly</b>                                  | <b>0.06788</b> | <b>0.13178</b> | <b>0.21402</b> |
| <b>NDVI spatial</b>                                 | <b>0.07972</b> | <b>0.14734</b> | <b>0.22909</b> |
| Population P2*NDVI spatial                          | -0.13970       | -0.06285       | 0.00997        |
| Population P3*NDVI spatial                          | -0.22359       | -0.14687       | -0.05591       |
| Population P2*NDVI yearly                           | -0.21471       | -0.07073       | 0.03484        |

|                                             |               |               |               |
|---------------------------------------------|---------------|---------------|---------------|
| Population P3*NDVI yearly                   | -0.25088      | -0.12812      | 0.00258       |
| <b>C. Body mass adult male red deer</b>     |               |               |               |
| Intercept                                   | -0.7865       | 1.6869        | 3.3700        |
| Age                                         | 21.8351       | 24.4292       | 26.8717       |
| (Age) <sup>2</sup>                          | -14.2211      | -12.7262      | -10.9379      |
| (Age) <sup>3</sup>                          | 4.2745        | 5.3451        | 6.6754        |
| (Age) <sup>4</sup>                          | -1.4900       | -1.0302       | 0.9882        |
| (Age) <sup>5</sup>                          | -0.1637       | 0.2666        | 1.5010        |
| (Age) <sup>6</sup>                          | -0.3673       | -0.0038       | 0.7470        |
| st(Date of culling)                         | 0.0064        | 0.0118        | 0.0179        |
| st(Current density)                         | -0.0272       | -0.0084       | 0.0099        |
| st(Date of culling)*st(Current density)     | -0.0070       | -0.0024       | 0.0038        |
| Age*st(Date of culling)*st(Current density) | -0.0015       | 0.0010        | 0.0030        |
| Age*st(Date of culling)                     | -0.0189       | -0.0164       | -0.0144       |
| Age*st(Current density)                     | -0.0034       | -0.0007       | 0.0023        |
| NAO-winter                                  | 0.0033        | 0.0067        | 0.0094        |
| Cohort NAO-winter                           | -0.0009       | 0.0005        | 0.0019        |
| Cohort density                              | -0.0928       | -0.0566       | -0.0205       |
| Diversity of altitudes                      | 0.0494        | 0.0765        | 0.1074        |
| Diversity of aspects                        | 0.3401        | 1.1605        | 2.3759        |
| Prop. of north facing slopes                | -0.9424       | -0.6686       | -0.3577       |
| Prop. of high altitude habitat              | -0.2086       | -0.1366       | -0.0634       |
| Latitude                                    | -0.0049       | 0.0062        | 0.0180        |
| Distance from the coast                     | 0.0643        | 0.0921        | 0.1112        |
| Population P2                               | -0.0450       | 0.0242        | 0.0915        |
| Population P3                               | -0.0390       | 0.0543        | 0.1511        |
| <b>NDVI yearly</b>                          | <b>0.0033</b> | <b>0.0802</b> | <b>0.1821</b> |
| <b>NDVI spatial</b>                         | <b>0.0587</b> | <b>0.1570</b> | <b>0.2382</b> |
| Population P2*NDVI spatial                  | -0.1387       | -0.0234       | 0.1536        |
| Population P3*NDVI spatial                  | -0.2515       | -0.1514       | -0.0614       |
| Population P2*NDVI yearly                   | -0.2775       | -0.1116       | 0.0989        |
| Population P3*NDVI yearly                   | -0.1367       | -0.0105       | 0.1220        |

Figure 1A: Example of the spatial blocks considered for the bootstrap analyses. In this particular case, blocks were generated dividing latitude and longitude ranges by 4.

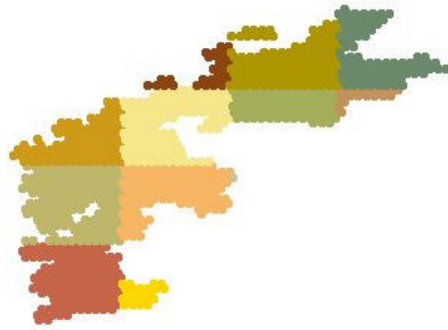

Figure 2A: The relationship between NDVI – 1<sup>st</sup> of May in the winter range and the starting date of migration for red deer in Norway.

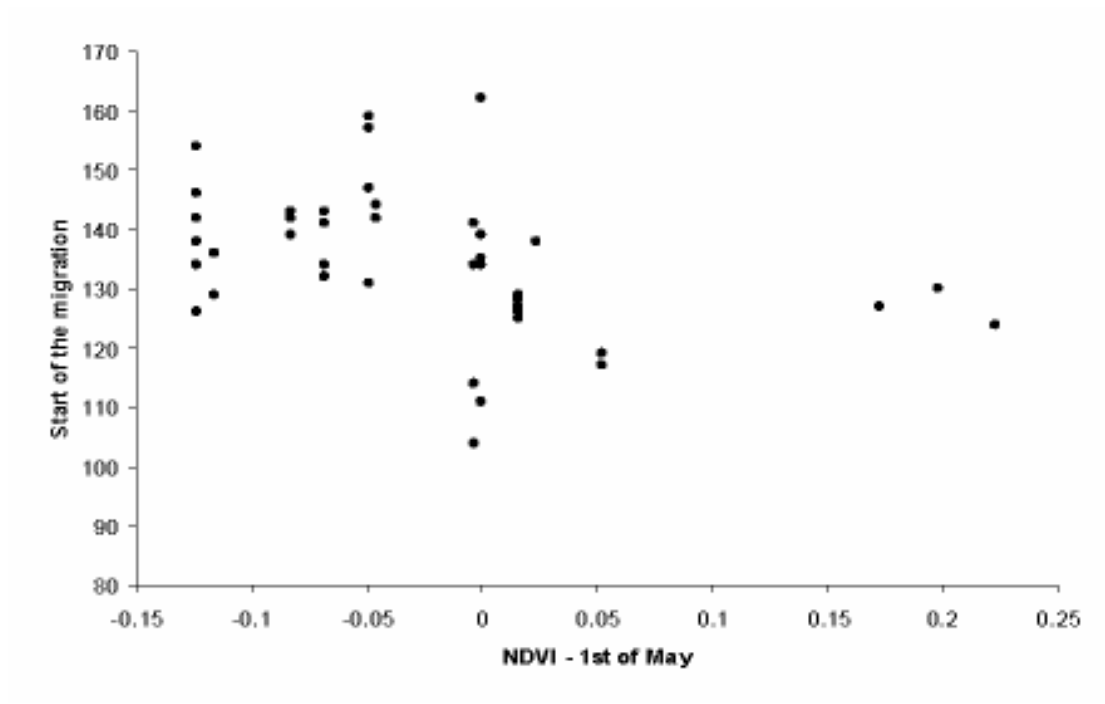

Figure 3A: Partial residual plots (with a smooth term) for the effect of NDVI on body weight of female red deer for population “P1” situated along the west coast of Norway. (a) Annual variation in NDVI on 1<sup>st</sup> of May. (b) Spatial variation in the NDVI.

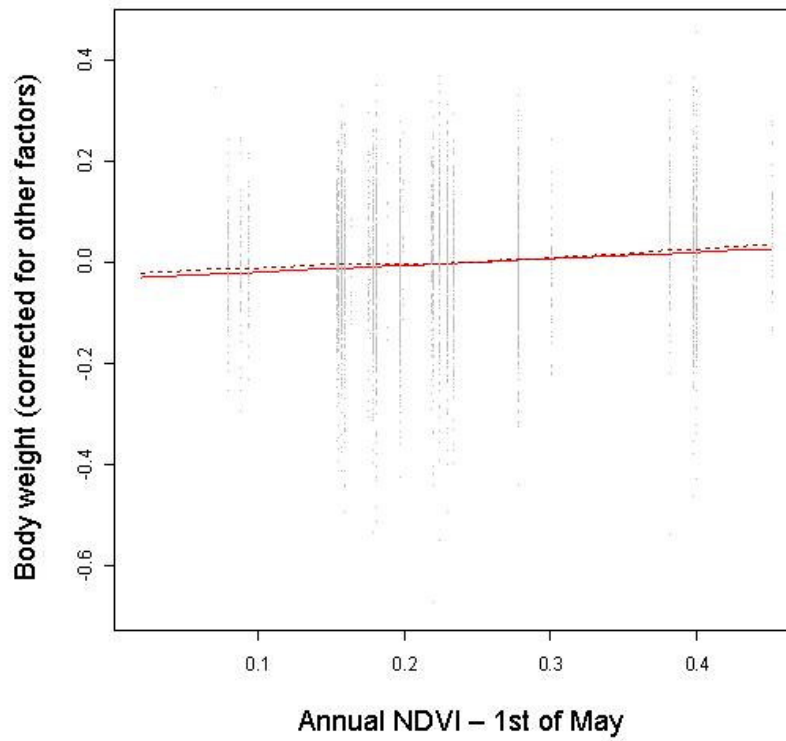

Fig. 3A a



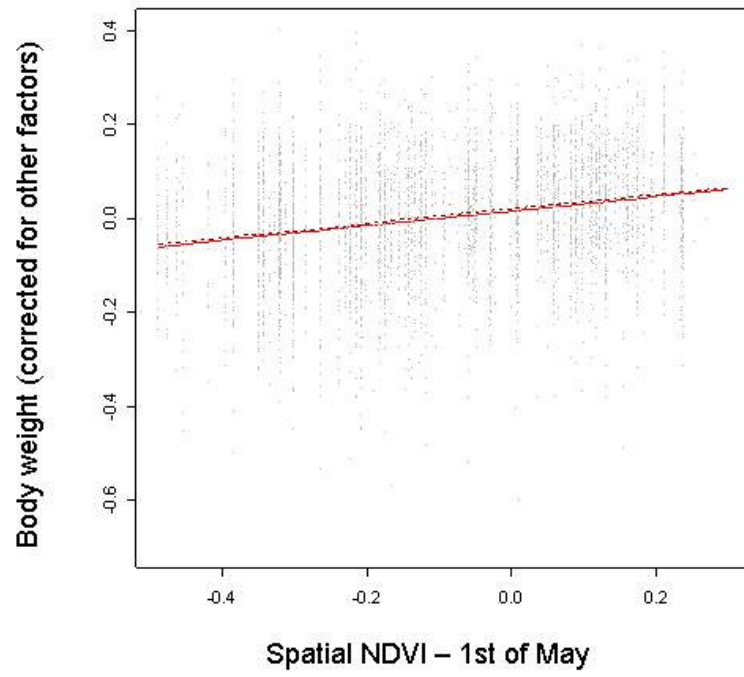

Fig. 3A b
